# Supplementary material for: Last Glacial and Holocene dynamics override post-colonial disturbance in shaping genetic diversity of a heavily exploited palaeoendemic conifer, Lagarostrobos franklinii
Source: Research Square preprint supplement (doi:10.21203/rs.3.rs-6792156/v1), 2025-06-16
Supplement: Supplementary file 1 [file 93ae3d8497829065159002ae.docx]

**SUPPORTING MATERIALS**

Last Glacial and Holocene dynamics override post-colonial disturbance in shaping genetic diversity of a heavily exploited palaeoendemic conifer, *Lagarostrobos franklinii*

James R.P. Worth, James R. Marthick, Yoshihisa Suyama, Gregory J. Jordan


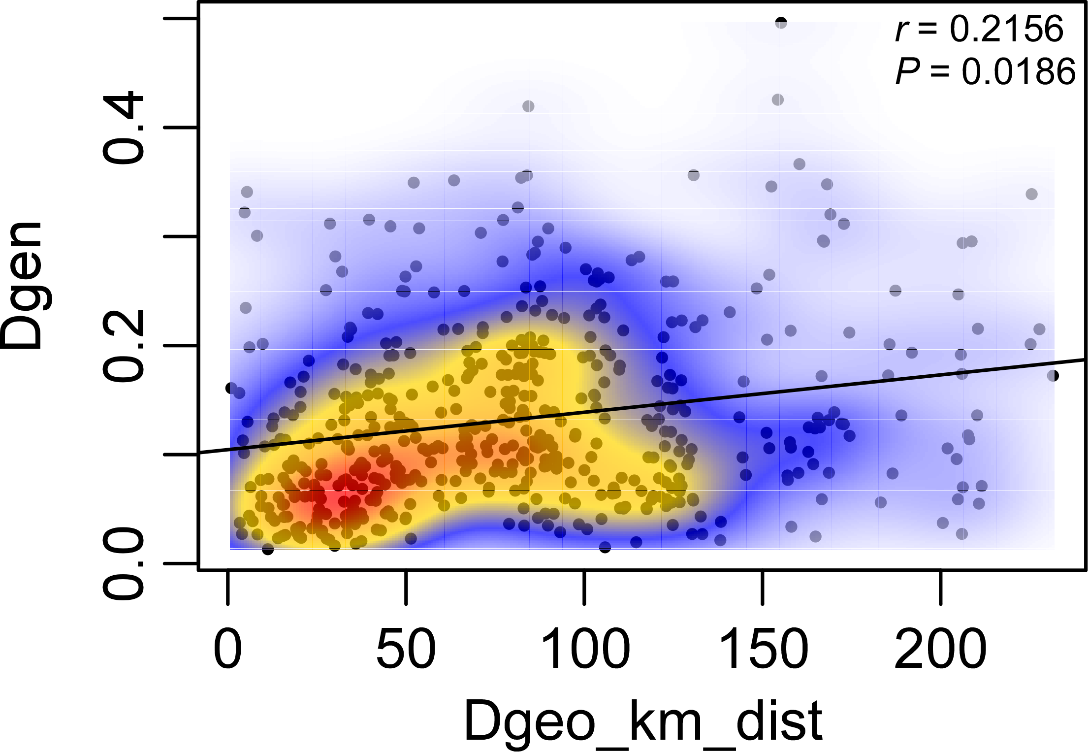


Figure S1 Plot of isolation by distance for the nSSR dataset with an upward sloping black trend line and results of the Mantel test indicated in the top right corner. Colours represent local 2-dimensional kernel density of points varying from high (red) to low (blue).


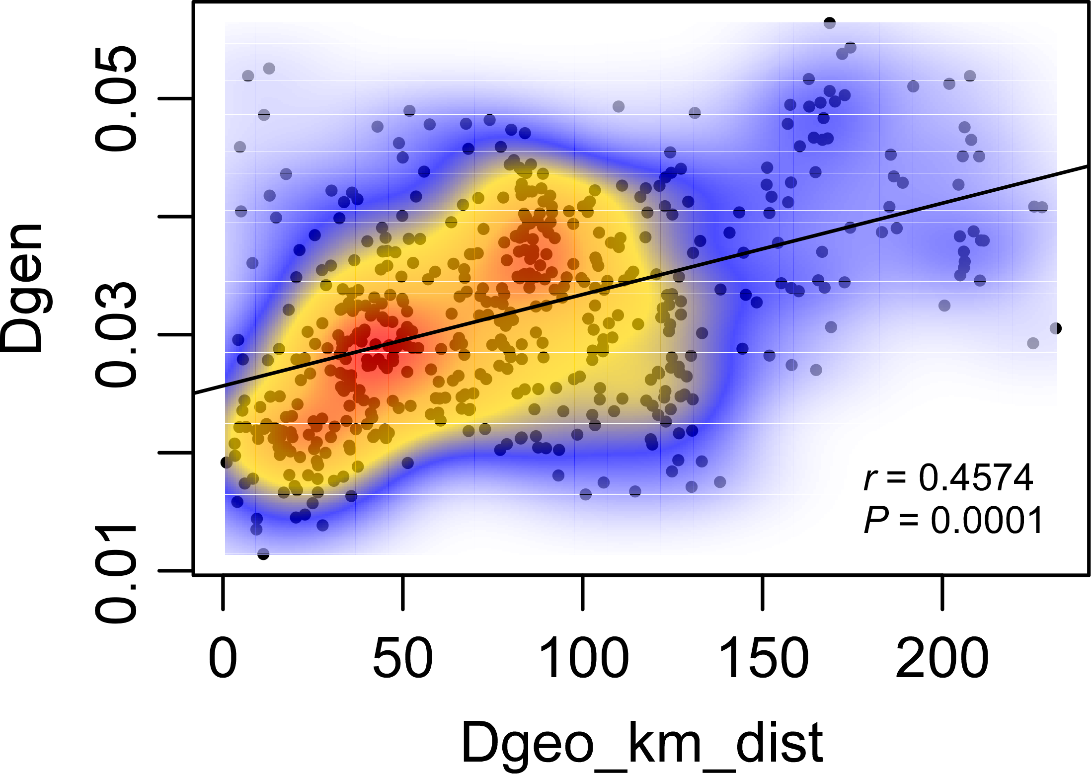


Figure S2 Plot of isolation by distance for the MIG-seq dataset with an upward sloping black trend line and results of the Mantel test indicated in the top right corner. Colours represent local 2-dimensional kernel density of points varying from high (red) to low (blue).


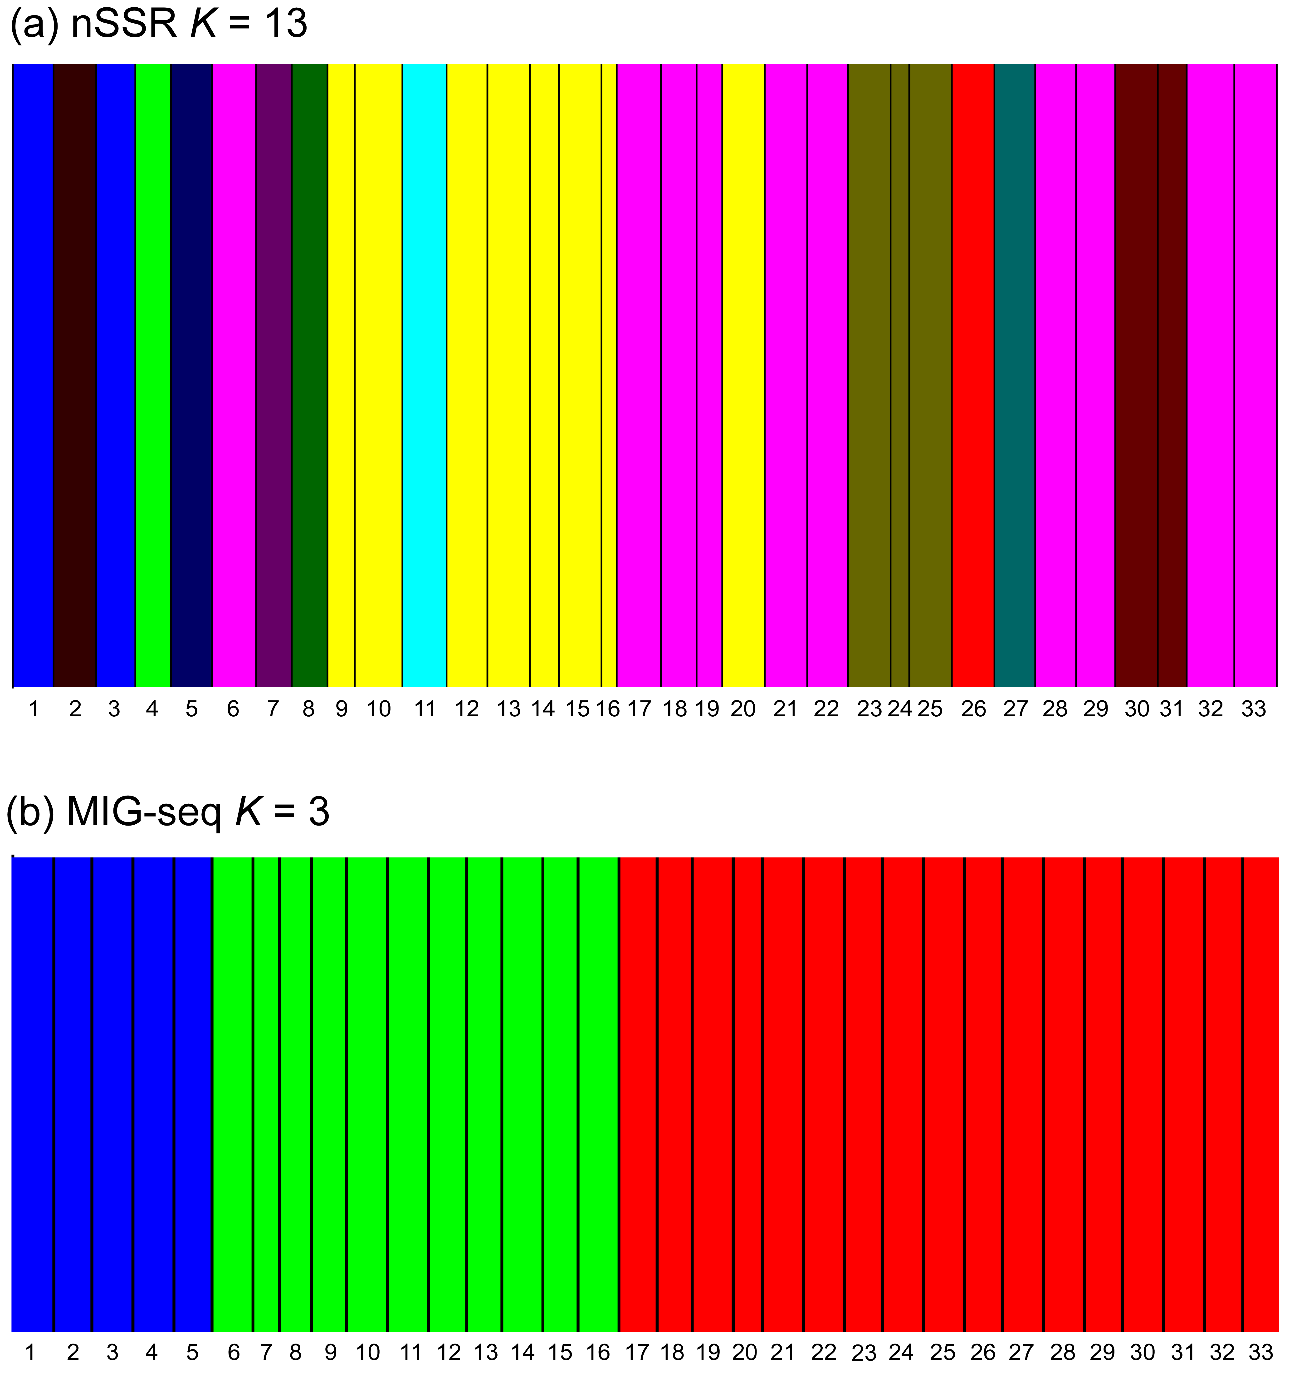


Figure S3 BAPS results showing the ‘clustering of groups of individuals’ according to the best K for both nuclear SSR (a) and MIG-seq (b) datasets. Different colours indicate the different clusters and numbers below the graph indicate the population numbers according to Table 1 of the main text.

**Table S1** Summary of the results of FreeNa software for the 8 nuclear loci used for genetic analyses.

| Locus | Average Estimate of null allele frequency across populations | *Fst* not using ENA | *Fst* using ENA |
| --- | --- | --- | --- |
| Huon_23318 | 0.015 | 0.102 | 0.101 |
| Huon_50967 | 0.008 | 0.074 | 0.075 |
| Huon_7288 | 0.029 | 0.064 | 0.064 |
| Huon_23863 | 0.017 | 0.129 | 0.129 |
| Huon_18442 | 0.012 | 0.121 | 0.117 |
| Huon_3945 | 0.010 | 0.123 | 0.122 |
| Huon_50224 | 0.019 | 0.077 | 0.074 |
| Huon_13112 | 0.019 | 0.115 | 0.113 |
| Average | 0.016 | 0.100 | 0.099 |

**Table S2** Summary of BayeScan results for each of three independent runs for all 8 nuclear microsatellites under prior odds of 100 and 1000

| Locus | Run 1 | | Run 2 | | Run 3 | |
| --- | --- | --- | --- | --- | --- | --- |
| *Prior odds 100* | prob | alpha | prob | alpha | prob | alpha |
| Huon_23318 | 0.0030 | -0.0005 | 0.0018 | -0.0002 | 0.0024 | 0.0000 |
| Huon_50967 | 0.0038 | -0.0002 | 0.0056 | 0.0004 | 0.0022 | -0.0001 |
| Huon_7288 | 0.0092 | -0.0052 | 0.0100 | -0.0047 | 0.0106 | -0.0061 |
| Huon_23863 | 0.0060 | 0.0008 | 0.0042 | 0.0008 | 0.0048 | 0.0016 |
| Huon_18442 | 0.0032 | -0.0008 | 0.0024 | -0.0003 | 0.0020 | -0.0001 |
| Huon_3945 | 0.0026 | -0.0003 | 0.0018 | -0.0004 | 0.0020 | -0.0003 |
| Huon_50224 | 0.0774 | -0.0489 | 0.0784 | -0.0498 | 0.0904 | -0.0581 |
| Huon_13112 | 0.0032 | 0.0005 | 0.0026 | 0.0006 | 0.0030 | 0.0003 |
| *Prior odds 1000* | prob | alpha | prob | alpha | prob | alpha |
| Huon_23318 | 0.0004 | 0.0000 | 0.0004 | 0.0000 | 0.0004 | 0.0000 |
| Huon_50967 | 0.0000 | 0.0000 | 0.0006 | 0.0001 | 0.0002 | 0.0000 |
| Huon_7288 | 0.0006 | -0.0004 | 0.0010 | -0.0006 | 0.0016 | -0.0006 |
| Huon_23863 | 0.0012 | 0.0002 | 0.0002 | 0.0001 | 0.0008 | 0.0002 |
| Huon_18442 | 0.0000 | 0.0000 | 0.0002 | 0.0000 | 0.0002 | 0.0000 |
| Huon_3945 | 0.0002 | 0.0000 | 0.0002 | 0.0000 | 0.0000 | 0.0000 |
| Huon_50224 | 0.0030 | -0.0018 | 0.0022 | -0.0011 | 0.0032 | -0.0024 |
| Huon_13112 | 0.0004 | -0.0001 | 0.0002 | 0.0000 | 0.0000 | 0.0000 |

prob = the posterior probability for the model including selection; alpha= a coefficient indicating the strength and direction of selection (+ve indicates diversifying while -ve indicates balancing.

**Table S3** Summary of BayeScan results for each of three independent runs for all 845 MIG-seq SNPs under prior odds of 100 and 1000. The results shown are the average (standard dev.) over all loci and minimum and maximum values.

|  | Run 1 | | | Run 2 | | | Run 3 | | |
| --- | --- | --- | --- | --- | --- | --- | --- | --- | --- |
| *Prior odds 100* | | prob | alpha | | prob | alpha | | prob | alpha | |
| average | | 0.009852 | 9.8E-05 | | 0.0098 | 0.000055 | | 0.00981 | 0.00008 | |
| *(standard dev.)* | | *0.00244* | *0.00511* | | *0.00238* | *0.005* | | *0.00245* | *0.00509* | |
| minimum | | 0.004801 | -0.01302 | | 0.004601 | -0.01301 | | 0.004201 | -0.01499 | |
| maximum | | 0.025605 | 0.031923 | | 0.030206 | 0.032883 | | 0.029206 | 0.034206 | |
| *Prior odds 1000* | | prob | alpha | | prob | alpha | | prob | alpha | |
| average | | 0.00098 | 1.69E-05 | | 0.000996 | 2.17E-05 | | 0.000996 | 1.82E-05 | |
| *(standard dev.)* | | *0.00046* | *0.00064* | | *0.00051* | *0.00066* | | *0.0005* | *0.00066* | |
| minimum | | 0 | -0.00244 | | 0 | -0.00223 | | 0 | -0.00257 | |
| maximum | | 0.003201 | 0.002997 | | 0.004601 | 0.004845 | | 0.004401 | 0.005903 | |

**Table S4** Locus-based genetic diversity and differentiation statistics for the 33 *Lagarostrobos franklinii* populations.

| *Locus* | No. alleles | *Na* | *Ne* | *Ho* | *He* | *Fis* | *Fst* | *G'stH* | | *Dest* | |
| --- | --- | --- | --- | --- | --- | --- | --- | --- | --- | --- | --- |
| Huon_23318 | 18 | 5.45 | 2.07 | 0.47 | 0.46 | -0.02 | 0.12 | 0.190 | | 0.10 | |
| Huon_50967 | 12 | 3.82 | 1.92 | 0.47 | 0.45 | -0.04 | 0.09 | 0.127 | | 0.06 | |
| Huon_7288 | 4 | 2.85 | 1.96 | 0.47 | 0.48 | 0.01 | 0.08 | 0.116 | | 0.06 | |
| Huon_23863 | 5 | 2.15 | 1.64 | 0.38 | 0.36 | -0.03 | 0.14 | 0.194 | | 0.08 | |
| Huon_18442 | 10 | 4.61 | 1.83 | 0.42 | 0.40 | -0.04 | 0.13 | 0.194 | | 0.09 | |
| Huon_3945 | 17 | 5.15 | 2.42 | 0.57 | 0.54 | -0.05 | 0.13 | 0.263 | | 0.17 | |
| Huon_50224 | 6 | 3.73 | 2.35 | 0.55 | 0.55 | -0.01 | 0.10 | 0.179 | | 0.11 | |
| Huon_13112 | 8 | 4.85 | 2.78 | 0.62 | 0.61 | -0.01 | 0.13 | 0.294 | | 0.21 | |
| Average | 10.00 | 4.08 | 2.12 | 0.49 | 0.48 | -0.02 | 0.11 | 0.19 | 0.11 | |

No. alleles = number of alleles observed at locus, *Na* = mean no. of different alleles over populations, *Ne* = mean no. of effective alleles over populations, *Ho* = mean observed heterozygosity, *He* = mean expected heterozygosity, *Fis* = Inbreeding coefficient, *Fst* = Inbreeding coefficient within subpopulations, relative to total = genetic differentiation among populations and *Dest* = Jost's estimate of differentiation.

**Table S5** Population level nSSR based genetic diversity and differentiation statistics for the 33 *Lagarostrobos franklinii* populations.

| no. | Pop | Catchment | Na | *Ne* | *Ho* | *He* | *uHe* | *Fis* | *Ar* | *Par* |
| --- | --- | --- | --- | --- | --- | --- | --- | --- | --- | --- |
| 1 | Yellow Ck | Pieman | 3.00 | 1.86 | 0.38 | 0.41 | 0.42 | 0.04 | 2.53 | 0.02 |
| 2 | Harman Rv | Pieman | 4.00 | 2.47 | 0.62 | 0.58 | 0.59 | -0.06 | 3.24 | 0.05 (1) |
| 3 | Wilsons Rv | Pieman | 3.75 | 2.04 | 0.52 | 0.50 | 0.51 | -0.04 | 3.2 | 0.01 |
| 4 | Stanley Rv | Pieman | 2.75 | 1.55 | 0.36 | 0.33 | 0.34 | -0.09 | 2.35 | 0.03 |
| 5 | Corrina | Pieman | 4.13 | 2.49 | 0.56 | 0.54 | 0.55 | -0.02 | 3.41 | 0.17 (2) |
| 6 | Newell Ck | King | 5.13 | 2.00 | 0.46 | 0.48 | 0.49 | 0.07 | 3.59 | 0.08 (2) |
| 7 | Teepookana Plateau | King | 4.63 | 2.42 | 0.55 | 0.53 | 0.54 | -0.03 | 3.63 | 0.08 (1) |
| 8 | Bird Rv | Bird | 3.75 | 1.95 | 0.52 | 0.47 | 0.48 | -0.10 | 2.94 | 0.05 (1) |
| 9 | Loddon Franklin | Franklin | 4.00 | 2.34 | 0.55 | 0.50 | 0.51 | -0.07 | 3.38 | 0 |
| 10 | Lake Vera | Franklin | 4.38 | 2.26 | 0.52 | 0.52 | 0.52 | -0.02 | 3.46 | 0.02 |
| 11 | Lake Marylin | Franklin | 3.88 | 1.99 | 0.50 | 0.48 | 0.49 | -0.06 | 3.11 | 0.16 (2) |
| 12 | Buckleys Chance | Franklin | 3.88 | 2.44 | 0.54 | 0.51 | 0.52 | -0.08 | 3.19 | 0.05 |
| 13 | Erebus Jane Cf | Franklin | 4.13 | 2.14 | 0.47 | 0.48 | 0.49 | 0.01 | 3.28 | 0 |
| 14 | Newlands Cascade Franklin | Franklin | 4.38 | 2.31 | 0.54 | 0.53 | 0.54 | -0.02 | 3.68 | 0.06 (1) |
| 15 | Jane Rv | Franklin | 5.38 | 2.25 | 0.49 | 0.50 | 0.51 | 0.00 | 3.71 | 0.01 |
| 16 | Kutikina Cave Franklin | Franklin | 4.00 | 2.45 | 0.51 | 0.56 | 0.58 | 0.08 | 3.87 | 0.04 |
| 17 | Gordon Rv 15km up | Gordon/Denison | 5.13 | 2.05 | 0.52 | 0.49 | 0.50 | -0.05 | 3.69 | 0.03 |
| 18 | Sir John Falls | Gordon/Denison | 4.75 | 2.12 | 0.58 | 0.51 | 0.52 | -0.16 | 3.61 | 0.1 (1) |
| 19 | Denison Gordon Cf | Gordon/Denison | 4.38 | 1.98 | 0.49 | 0.47 | 0.48 | -0.03 | 3.64 | 0.04 |
| 20 | Denison Rv | Gordon/Denison | 5.25 | 2.10 | 0.50 | 0.49 | 0.50 | -0.04 | 3.73 | 0.13 (2) |
| 21 | Serpentine Gorge | Gordon/Denison | 4.25 | 2.26 | 0.49 | 0.52 | 0.53 | 0.05 | 3.61 | 0.03 |
| 22 | Gilbert Leitch HP Reserve | Gordon/Denison | 3.50 | 2.04 | 0.46 | 0.46 | 0.47 | 0.04 | 3.11 | 0 |
| 23 | Davey Rv | Davey | 4.38 | 2.08 | 0.44 | 0.46 | 0.46 | 0.01 | 3.18 | 0.11 (1) |
| 24 | Badgers Ck | Davey | 3.38 | 2.21 | 0.53 | 0.47 | 0.48 | -0.11 | 3.14 | 0 |
| 25 | Crossing Rv | Davey | 3.88 | 2.11 | 0.49 | 0.47 | 0.48 | -0.04 | 2.98 | 0.07 (1) |
| 26 | Condominium Ck | Huon/Picton | 3.63 | 1.94 | 0.40 | 0.43 | 0.43 | 0.06 | 2.92 | 0.04 |
| 27 | Lake Judd | Huon/Picton | 3.00 | 2.15 | 0.42 | 0.44 | 0.45 | 0.04 | 2.51 | 0 |
| 28 | Scotts Peak | Huon/Picton | 4.25 | 1.99 | 0.45 | 0.42 | 0.43 | -0.06 | 3.04 | 0.03 |
| 29 | Huon Rv Gorge | Huon/Picton | 4.00 | 1.86 | 0.44 | 0.44 | 0.45 | 0.01 | 2.92 | 0.02 |
| 30 | Farmhouse Ck | Huon/Picton | 3.63 | 2.08 | 0.50 | 0.49 | 0.50 | -0.02 | 2.9 | 0 |
| 31 | Riveaux Ck | Huon/Picton | 3.13 | 2.10 | 0.47 | 0.49 | 0.50 | 0.03 | 2.82 | 0 |
| 32 | Tahune | Huon/Picton | 4.38 | 1.86 | 0.46 | 0.45 | 0.45 | -0.01 | 3.19 | 0 |
| 33 | Southwood | Huon/Picton | 4.50 | 2.06 | 0.54 | 0.50 | 0.51 | -0.08 | 3.56 | 0.14 (1) |

*Na* = mean no. of different alleles over populations, *Ne* = mean no. of effective alleles over populations, *Ho* = mean observed heterozygosity, *He* = mean expected heterozygosity, *uHe* = unbiased expected heterozygosity, *Fis* = Inbreeding coefficient, *Ar* = rarefied allelic richness, PAr = rarefied private allelic richness with observed number of private alleles in brackets.

**Table S6** Population level MIG-seq based genetic diversity and differentiation statistics for the 33 *Lagarostrobos franklinii* populations.

| no. | Population | | Catchment | | % Polymorphic Loci | | *Na* | | *Ne* | | *Ho* | | *He* | | *uHe* | | *Fis* | | *Ar* | | *Par* | |
| --- | --- | --- | --- | --- | --- | --- | --- | --- | --- | --- | --- | --- | --- | --- | --- | --- | --- | --- | --- | --- | --- | --- |
| 1 | Yellow Ck | Pieman | | 35.50 | | 1.355 | | 1.192 | | 0.116 | | 0.115 | | 0.124 | | -0.021 | | 1.300 | | 0 (0) | |
| 2 | Harman Rv | Pieman | | 40.12 | | 1.401 | | 1.212 | | 0.137 | | 0.127 | | 0.136 | | -0.070 | | 1.329 | | 0.0059 (5) | |
| 3 | Wilsons Rv | Pieman | | 40.83 | | 1.408 | | 1.208 | | 0.127 | | 0.127 | | 0.136 | | -0.015 | | 1.337 | | 0.0047 (4) | |
| 4 | Stanley Rv | Pieman | | 38.70 | | 1.387 | | 1.203 | | 0.128 | | 0.123 | | 0.131 | | -0.041 | | 1.320 | | 0.0047 (4) | |
| 5 | Corrina | Pieman | | 42.72 | | 1.427 | | 1.212 | | 0.123 | | 0.130 | | 0.140 | | 0.035 | | 1.350 | | 0.0059 (5) | |
| 6 | Newell Ck | King | | 45.21 | | 1.452 | | 1.226 | | 0.140 | | 0.138 | | 0.148 | | -0.028 | | 1.368 | | 0.0083 (7) | |
| 7 | Teepookana Plateau | King | | 37.99 | | 1.380 | | 1.200 | | 0.132 | | 0.122 | | 0.137 | | -0.078 | | 1.350 | | 0.0024 (2) | |
| 8 | Bird Rv | Bird | | 45.33 | | 1.453 | | 1.235 | | 0.150 | | 0.142 | | 0.154 | | -0.058 | | 1.381 | | 0.0024 (2) | |
| 9 | Loddon Franklin conflu | Franklin | | 47.34 | | 1.473 | | 1.232 | | 0.144 | | 0.143 | | 0.154 | | -0.028 | | 1.389 | | 0.0024 (2) | |
| 10 | Lake Vera | Franklin | | 46.27 | | 1.463 | | 1.235 | | 0.148 | | 0.143 | | 0.153 | | -0.047 | | 1.376 | | 0 (0) | |
| 11 | Lake Marilyn | Franklin | | 45.92 | | 1.459 | | 1.236 | | 0.148 | | 0.142 | | 0.152 | | -0.039 | | 1.372 | | 0.0012 (1) | |
| 12 | Buckleys Chance | Franklin | | 44.14 | | 1.441 | | 1.234 | | 0.145 | | 0.141 | | 0.150 | | -0.037 | | 1.366 | | 0 (0) | |
| 13 | Erebus Jane conflu | Franklin | | 47.22 | | 1.472 | | 1.238 | | 0.149 | | 0.145 | | 0.157 | | -0.040 | | 1.390 | | 0.0047 (4) | |
| 14 | Newlands Cascade | Franklin | | 49.70 | | 1.497 | | 1.239 | | 0.147 | | 0.147 | | 0.157 | | -0.012 | | 1.396 | | 0.0012 (1) | |
| 15 | Jane Rv | Franklin | | 48.88 | | 1.489 | | 1.248 | | 0.152 | | 0.151 | | 0.163 | | -0.021 | | 1.407 | | 0 (0) | |
| 16 | Kutikina Cave | Franklin | | 49.11 | | 1.491 | | 1.240 | | 0.145 | | 0.147 | | 0.157 | | 0.003 | | 1.393 | | 0 (0) | |
| 17 | Gordon Rv 15km up | Gordon/Denison | | 53.25 | | 1.533 | | 1.247 | | 0.158 | | 0.153 | | 0.164 | | -0.035 | | 1.418 | | 0.0012 (1) | |
| 18 | Sir John Falls | Gordon/Denison | | 50.89 | | 1.509 | | 1.245 | | 0.161 | | 0.152 | | 0.165 | | -0.050 | | 1.419 | | 0 (0) | |
| 19 | Denison Gordon conflu | Gordon/Denison | | 52.31 | | 1.523 | | 1.254 | | 0.166 | | 0.157 | | 0.168 | | -0.057 | | 1.422 | | 0.0036 (3) | |
| 20 | Denison Rv | Gordon/Denison | | 49.70 | | 1.497 | | 1.244 | | 0.158 | | 0.151 | | 0.166 | | -0.047 | | 1.425 | | 0 (0) | |
| 21 | Serpentine Gorge | Gordon/Denison | | 47.81 | | 1.478 | | 1.240 | | 0.149 | | 0.146 | | 0.156 | | -0.031 | | 1.387 | | 0 (0) | |
| 22 | Gilbert Leitch HP Reserve | Gordon/Denison | | 46.63 | | 1.466 | | 1.224 | | 0.139 | | 0.139 | | 0.150 | | -0.008 | | 1.380 | | 0.0024 (2) | |
| 23 | Davey Rv | Davey | | 50.65 | | 1.507 | | 1.232 | | 0.142 | | 0.145 | | 0.155 | | 0.002 | | 1.398 | | 0.0012 (1) | |
| 24 | Badgers Ck | Davey | | 49.11 | | 1.491 | | 1.225 | | 0.143 | | 0.141 | | 0.150 | | -0.026 | | 1.386 | | 0 (0) | |
| 25 | Crossing Rv | Davey | | 46.98 | | 1.470 | | 1.238 | | 0.152 | | 0.145 | | 0.155 | | -0.041 | | 1.383 | | 0.0036 (3) | |
| 26 | Condominium Ck | Huon/Picton | | 40.47 | | 1.404 | | 1.207 | | 0.124 | | 0.126 | | 0.136 | | -0.002 | | 1.334 | | 0.0012 (1) | |
| 27 | Lake Judd | Huon/Picton | | 38.11 | | 1.381 | | 1.185 | | 0.119 | | 0.114 | | 0.122 | | -0.052 | | 1.307 | | 0.0047 (4) | |
| 28 | Scotts Peak | Huon/Picton | | 42.25 | | 1.422 | | 1.212 | | 0.137 | | 0.129 | | 0.138 | | -0.064 | | 1.342 | | 0.0036 (3) | |
| 29 | Huon Rv Gorge | Huon/Picton | | 47.69 | | 1.477 | | 1.227 | | 0.149 | | 0.141 | | 0.151 | | -0.056 | | 1.380 | | 0.0036 (3) | |
| 30 | Farmhouse Ck | Huon/Picton | | 45.92 | | 1.459 | | 1.227 | | 0.139 | | 0.139 | | 0.148 | | -0.015 | | 1.369 | | 0 (0) | |
| 31 | Riveaux Ck | Huon/Picton | | 40.71 | | 1.407 | | 1.223 | | 0.143 | | 0.133 | | 0.143 | | -0.072 | | 1.343 | | 0.0024 (2) | |
| 32 | Tahune | Huon/Picton | | 51.95 | | 1.520 | | 1.247 | | 0.149 | | 0.153 | | 0.164 | | 0.015 | | 1.412 | | 0.0012 (1) | |
| 33 | Southwood | Huon/Picton | | 49.82 | | 1.498 | | 1.234 | | 0.143 | | 0.145 | | 0.155 | | -0.004 | | 1.393 | | 0 (0) | |

**Table S7** Genetic diversity statistic means, standard deviations (SD) and standard errors (SE) by disturbance history for both nSSR and MIG-seq datasets

|  |  |  | nSSR | | | MIG-seq | | |
| --- | --- | --- | --- | --- | --- | --- | --- | --- |
| Genetic diversity statistic | Disturbance history | N | Mean | SD | SE | Mean | SD | SE | |
| *Na* | disturbed | 12 | 3.9063 | 0.5669 | 0.1637 | 1.44477 | 0.04348 | 0.01255 | |
| primary | 21 | 4.1726 | 0.6783 | 0.148 | 1.46447 | 0.04767 | 0.0104 | |
| *Ne* | disturbed | 12 | 2.1635 | 0.1975 | 0.057 | 1.22396 | 0.01597 | 0.00461 | |
| primary | 21 | 2.0952 | 0.2157 | 0.0471 | 1.22924 | 0.01789 | 0.0039 | |
| *Ho* | disturbed | 12 | 0.5002 | 0.0656 | 0.0189 | 0.13969 | 0.01206 | 0.00348 | |
| primary | 21 | 0.4887 | 0.0517 | 0.0113 | 0.14391 | 0.01172 | 0.00256 | |
| *He* | disturbed | 12 | 0.4877 | 0.0442 | 0.0128 | 0.13678 | 0.01042 | 0.00301 | |
| primary | 21 | 0.4787 | 0.049 | 0.0107 | 0.14054 | 0.01151 | 0.00251 | |
| *uHe* | disturbed | 12 | 0.4975 | 0.0447 | 0.0129 | 0.14693 | 0.01153 | 0.00333 | |
| primary | 21 | 0.4889 | 0.0516 | 0.0113 | 0.15102 | 0.01203 | 0.00263 | |
| *Ar* | disturbed | 12 | 3.2183 | 0.3153 | 0.091 | 1.36508 | 0.03406 | 0.00983 | |
| primary | 21 | 3.2619 | 0.4261 | 0.093 | 1.37814 | 0.03259 | 0.00711 | |
| *PAr* | disturbed | 12 | 0.0425 | 0.0515 | 0.0149 | 0.00148 | 0.00202 | 0.00058 | |
| primary | 21 | 0.0505 | 0.0486 | 0.0106 | 0.0026 | 0.00226 | 0.000494 | |
| *Fis* | disturbed | 12 | -0.0232 | 0.0585 | 0.0169 | -0.03096 | 0.0187 | 0.0054 | |
| primary | 21 | -0.0225 | 0.0559 | 0.0122 | -0.03189 | 0.03029 | 0.00661 | |

**Table S8** Results of one-way ANOVA analysis comparing means of genetic diversity indices with populations grouped by disturbance class (disturbed vs. primary). The results for nSSR dataset are shown in non-italic text and MIG-seq dataset in italic text. Significant comparisons are shown in bold (*P*= < 0.05).

| **Genetic diversity indices** | **F** | **df1** | **df2** | **P** |
| --- | --- | --- | --- | --- |
| Na | 1.45717 | 1 | 26.6 | 0.238 |
| *Na* | *1.4596* | *1* | *24.9* | *0.238* |
| Ne | 0.85306 | 1 | 24.8 | 0.365 |
| *Ne* | *0.762* | *1* | *25.3* | *0.391* |
| Ho | 0.27083 | 1 | 18.9 | 0.609 |
| *Ho* | *0.9557* | *1* | *22.5* | *0.339* |
| He | 0.28855 | 1 | 25.1 | 0.596 |
| *He* | *0.9232* | *1* | *25* | *0.346* |
| uHe | 0.24668 | 1 | 25.9 | 0.624 |
| *uHe* | *0.9316* | *1* | *23.9* | *0.344* |
| Ar | 0.11212 | 1 | 28.7 | 0.74 |
| *Ar* | *1.1581* | *1* | *22.2* | *0.293* |
| Par | 0.19047 | 1 | 21.9 | 0.667 |
| *Par* | *2.1539* | *1* | *25.3* | *0.155* |
| Fis | 0.00115 | 1 | 22.1 | 0.973 |
| *Fis* | *0.012* | *1* | *30.7* | *0.914* |

**Table S9** Genetic diversity statistic means, standard deviations (SD) and standard errors (SE) by stand type for both nSSR and MIG-seq datasets

| Genetic diversity statistic | Stand Type | N | nSSR | | | MIG-seq | | |
| --- | --- | --- | --- | --- | --- | --- | --- | --- |
| Mean | SD | SE | Mean | SD | SE | |
| *Na* | River/ Creek | 28 | 4.0982 | 0.65648 | 0.12406 | 1.4631 | 0.04561 | 0.00862 | |
| Lake | 3 | 3.75 | 0.69597 | 0.40182 | 1.43432 | 0.04615 | 0.02665 | |
| Non-riverine | 2 | 4.25 | 0.53033 | 0.375 | 1.41065 | 0.04351 | 0.03077 | |
| *Ne* | River/ Creek | 28 | 2.0962 | 0.20618 | 0.03896 | 1.22902 | 0.01566 | 0.00296 | |
| Lake | 3 | 2.136 | 0.13715 | 0.07918 | 1.21848 | 0.0291 | 0.0168 | |
| Non-riverine | 2 | 2.4304 | 0.01798 | 0.01271 | 1.21679 | 0.02368 | 0.01675 | |
| *Ho* | River/ Creek | 28 | 0.491 | 0.05773 | 0.01091 | 0.14308 | 0.01177 | 0.00222 | |
| Lake | 3 | 0.4769 | 0.05405 | 0.03121 | 0.13834 | 0.01693 | 0.00977 | |
| Non-riverine | 2 | 0.5436 | 0.00488 | 0.00345 | 0.13859 | 0.00863 | 0.0061 | |
| *He* | River/ Creek | 28 | 0.4798 | 0.04865 | 0.00919 | 0.14038 | 0.01048 | 0.00198 | |
| Lake | 3 | 0.4774 | 0.0386 | 0.02229 | 0.13296 | 0.01656 | 0.00956 | |
| Non-riverine | 2 | 0.519 | 0.01614 | 0.01141 | 0.13156 | 0.01288 | 0.00911 | |
| *uHe* | River/ Creek | 28 | 0.4901 | 0.05078 | 0.0096 | 0.15072 | 0.01141 | 0.00216 | |
| Lake | 3 | 0.4854 | 0.03871 | 0.02235 | 0.14219 | 0.0176 | 0.01016 | |
| Non-riverine | 2 | 0.529 | 0.0173 | 0.01223 | 0.14389 | 0.00927 | 0.00656 | |
| *Ar* | River/ Creek | 28 | 3.2579 | 0.38389 | 0.07255 | 1.37682 | 0.03331 | 0.0063 | |
| Lake | 3 | 3.0267 | 0.48045 | 0.27739 | 1.35167 | 0.03873 | 0.02236 | |
| Non-riverine | 2 | 3.41 | 0.31113 | 0.22 | 1.358 | 0.01131 | 0.008 | |
| *PAr* | River/ Creek | 28 | 0.045 | 0.04718 | 0.00892 | 0.00229 | 0.00227 | 4.30E-04 | |
| Lake | 3 | 0.06 | 0.08718 | 0.05033 | 0.00197 | 0.00244 | 0.00141 | |
| Non-riverine | 2 | 0.065 | 0.02121 | 0.015 | 0.0012 | 0.0017 | 0.0012 | |
| *Fis* | River/ Creek | 28 | -0.0216 | 0.05839 | 0.01103 | -0.02816 | 0.02653 | 0.00501 | |
| Lake | 3 | -0.0127 | 0.04799 | 0.02771 | -0.0459 | 0.00679 | 0.00392 | |
| Non-riverine | 2 | -0.0535 | 0.03463 | 0.02449 | -0.05753 | 0.02871 | 0.0203 | |

**Table S10** Results of one-way ANOVA analysis comparing means of genetic diversity indices with populations grouped by stand type (riverine/creek, lake and non-riverine or lake). The results for nSSR dataset are shown in non-italic text and MIG-seq dataset in italic text. Significant comparisons are shown in bold (*P*= < 0.05).

| **Genetic diversity indices** | **F** | **df1** | **df2** | ***P*** |
| --- | --- | --- | --- | --- |
| *Na* | 0.343 | 2 | 2.13 | 0.743 |
| *Na* | *1.322* | *2* | *2.07* | *0.427* |
| *Ne* | 34.165 | 2 | 5.11 | **0.001** |
| *Ne* | *0.322* | *2* | *1.89* | *0.758* |
| *Ho* | 11.061 | 2 | 5.03 | **0.014** |
| *Ho* | *0.25* | *2* | *2.14* | *0.799* |
| *He* | 3.198 | 2 | 3.21 | 0.172 |
| *He* | *0.527* | *2* | *1.94* | *0.657* |
| *uHe* | 2.87 | 2 | 3.16 | 0.195 |
| *uHe* | *0.588* | *2* | *2.08* | *0.627* |
| *Ar* | 0.445 | 2 | 2.1 | 0.69 |
| *Ar* | *1.575* | *2* | *2.77* | *0.349* |
| *Par* | 0.536 | 2 | 2.58 | 0.639 |
| *Par* | *0.288* | *2* | *2.17* | *0.774* |
| *Fis* | 0.643 | 2 | 2.39 | 0.598 |
| *Fis* | *3.397* | *2* | *2.55* | *0.191* |

**Table S11** Genetic diversity statistic means, standard deviations (SD) and standard errors (SE) by catchment for both nSSR and MIG-seq datasets

|  |  |  | | nSSR | | | | Mig-Seq | | | |
| --- | --- | --- | --- | --- | --- | --- | --- | --- | --- | --- | --- |
| Genetic diversity statistic | Catchment | N | Mean | | SD | SE | Mean | | SD | SE |
| Na | Pieman | 5 | 3.525 | | 0.61492 | 0.275 | 1.39574 | | 0.02698 | 0.01207 |
| King/Bird | 3 | 4.5 | | 0.69597 | 0.40182 | 1.4284 | | 0.04202 | 0.02426 |
| Franklin | 8 | 4.25 | | 0.49552 | 0.17519 | 1.47322 | | 0.01871 | 0.00661 |
| Gordon/Denison | 6 | 4.54167 | | 0.6455 | 0.26352 | 1.50099 | | 0.02565 | 0.01047 |
| Davey | 3 | 3.875 | | 0.5 | 0.28868 | 1.48915 | | 0.01842 | 0.01064 |
| Huon/Picton | 8 | 3.8125 | | 0.563 | 0.19905 | 1.44601 | | 0.04978 | 0.0176 |
| Ne | Pieman | 5 | 2.08358 | | 0.40257 | 0.18004 | 1.20545 | | 0.00816 | 0.00365 |
| King/Bird | 3 | 2.12228 | | 0.25705 | 0.14841 | 1.22051 | | 0.01826 | 0.01054 |
| Franklin | 8 | 2.27442 | | 0.15394 | 0.05443 | 1.23771 | | 0.0049 | 0.00173 |
| Gordon/Denison | 6 | 2.08926 | | 0.0957 | 0.03907 | 1.24239 | | 0.0101 | 0.00412 |
| Davey | 3 | 2.13441 | | 0.06913 | 0.03991 | 1.23148 | | 0.00649 | 0.00375 |
| Huon/Picton | 8 | 2.00531 | | 0.10988 | 0.03885 | 1.22029 | | 0.01895 | 0.0067 |
| Ho | Pieman | 5 | 0.48898 | | 0.11335 | 0.05069 | 0.12604 | | 0.0077 | 0.00344 |
| King/Bird | 3 | 0.5092 | | 0.04485 | 0.02589 | 0.1408 | | 0.00863 | 0.00498 |
| Franklin | 8 | 0.51457 | | 0.02574 | 0.0091 | 0.14707 | | 0.00262 | 9.26E-04 |
| Gordon/Denison | 6 | 0.50642 | | 0.04172 | 0.01703 | 0.15501 | | 0.0097 | 0.00396 |
| Davey | 3 | 0.48663 | | 0.04244 | 0.0245 | 0.14553 | | 0.00519 | 0.003 |
| Huon/Picton | 8 | 0.45979 | | 0.04613 | 0.01631 | 0.13782 | | 0.01103 | 0.0039 |
| He | Pieman | 5 | 0.47304 | | 0.10128 | 0.04529 | 0.12452 | | 0.00581 | 0.0026 |
| King/Bird | 3 | 0.49492 | | 0.03152 | 0.0182 | 0.13433 | | 0.01052 | 0.00608 |
| Franklin | 8 | 0.50876 | | 0.02522 | 0.00892 | 0.1448 | | 0.00334 | 0.00118 |
| Gordon/Denison | 6 | 0.48939 | | 0.0212 | 0.00865 | 0.14981 | | 0.00625 | 0.00255 |
| Davey | 3 | 0.46498 | | 0.00903 | 0.00522 | 0.14343 | | 0.0025 | 0.00145 |
| Huon/Picton | 8 | 0.45667 | | 0.03218 | 0.01138 | 0.13495 | | 0.01217 | 0.0043 |
| uHe | Pieman | 5 | 0.4818 | | 0.10272 | 0.04594 | 0.13345 | | 0.00598 | 0.00268 |
| King/Bird | 3 | 0.50452 | | 0.03238 | 0.0187 | 0.14664 | | 0.00865 | 0.00499 |
| Franklin | 8 | 0.52108 | | 0.03142 | 0.01111 | 0.15544 | | 0.00399 | 0.00141 |
| Gordon/Denison | 6 | 0.4991 | | 0.02096 | 0.00856 | 0.16125 | | 0.00687 | 0.0028 |
| Davey | 3 | 0.47662 | | 0.01147 | 0.00662 | 0.15337 | | 0.00262 | 0.00152 |
| Huon/Picton | 8 | 0.46522 | | 0.03322 | 0.01174 | 0.14453 | | 0.0129 | 0.00456 |
| Ar | Pieman | 5 | 2.946 | | 0.4729 | 0.21149 | 1.32720 | | 0.01878 | 0.00840 |
| King/Bird | 3 | 3.38667 | | 0.38734 | 0.22363 | 1.36633 | | 0.01557 | 0.00899 |
| Franklin | 8 | 3.46 | | 0.27077 | 0.09573 | 1.38613 | | 0.01368 | 0.00484 |
| Gordon/Denison | 6 | 3.565 | | 0.22784 | 0.09301 | 1.40850 | | 0.01964 | 0.00802 |
| Davey | 3 | 3.1 | | 0.10583 | 0.0611 | 1.38900 | | 0.00794 | 0.00458 |
| Huon/Picton | 8 | 2.9825 | | 0.30335 | 0.10725 | 1.36000 | | 0.03458 | 0.01223 |
| Par | Pieman | 5 | 0.056 | | 0.06542 | 0.02926 | 0.00424 | | 0.00244 | 0.00109 |
| King/Bird | 3 | 0.07 | | 0.01732 | 0.01 | 0.00437 | | 0.00341 | 0.00197 |
| Franklin | 8 | 0.0425 | | 0.05258 | 0.01859 | 0.00119 | | 0.00167 | 0.00059 |
| Gordon/Denison | 6 | 0.055 | | 0.0493 | 0.02012 | 0.00120 | | 0.00152 | 0.00062 |
| Davey | 3 | 0.06 | | 0.05568 | 0.03215 | 0.00160 | | 0.00183 | 0.00106 |
| Huon/Picton | 8 | 0.02875 | | 0.04764 | 0.01684 | 0.00209 | | 0.00176 | 0.00062 |
| Fis | Pieman | 5 | -0.03522 | | 0.05123 | 0.02291 | -0.02238 | | 0.03867 | 0.0173 |
| King/Bird | 3 | -0.0203 | | 0.08237 | 0.04756 | -0.0546 | | 0.0249 | 0.01438 |
| Franklin | 8 | -0.01928 | | 0.05201 | 0.01839 | -0.02759 | | 0.01688 | 0.00597 |
| Gordon/Denison | 6 | -0.0291 | | 0.07475 | 0.03051 | -0.03806 | | 0.01772 | 0.00723 |
| Davey | 3 | -0.04863 | | 0.05983 | 0.03454 | -0.02183 | | 0.0221 | 0.01276 |
| Huon/Picton | 8 | -0.00488 | | 0.04825 | 0.01706 | -0.03136 | | 0.03331 | 0.01178 |

**Table S12** Results of one-way ANOVA analysis comparing means of genetic diversity indices with populations grouped by river catchment. The results for nSSR dataset are shown in non-italic text and MIG-seq dataset in italic text. Significant comparisons are shown in bold (*P*= < 0.05). For the purpose of this analysis the single representative population from the Bird River catchment is grouped with the King River catchment.

|  | **F** | **df1** | **df2** | ***p*** |
| --- | --- | --- | --- | --- |
| *Na* | 1.76 | 5 | 8.84 | 0.219 |
| *Na* | *8.397* | *5* | *8.9* | ***0.003*** |
| *Ne* | 2.633 | 5 | 9.14 | 0.097 |
| *Ne* | *11.329* | *5* | *8.5* | ***0.001*** |
| *Ho* | 1.399 | 5 | 8.43 | 0.316 |
| *Ho* | *6.81* | *5* | *8.05* | ***0.009*** |
| *He* | 3.814 | 5 | 9.88 | **0.035** |
| *He* | *10.099* | *5* | *9.19* | ***0.002*** |
| *uHe* | 2.835 | 5 | 9.79 | 0.077 |
| *uHe* | *10.835* | *5* | *9.44* | ***0.001*** |
| *Ar* | 4.845 | 5 | 9.74 | **0.017** |
| *Ar* | *10.767* | *5* | *9.96* | ***<.001*** |
| *Par* | 0.807 | 5 | 9.92 | 0.57 |
| *Par* | *1.36* | *5* | *8.57* | *0.326* |
| *Fis* | 0.305 | 5 | 8.62 | 0.897 |
| *Fis* | *0.714* | *5* | *8.7* | *0.629* |
